# Supplementary material for: Systematic Review and Meta-Analysis of Laparoscopic versus Robotic-Assisted Surgery for Colon Cancer: Efficacy, Safety, and Outcomes—A Focus on Studies from 2020–2024
Source: MDPI journal article supplement (doi:10.3390/cancers16081552), 2024-04-18
Supplement: s1 [file s1]

**Search Strategy**  
**12.01.2024 ORA 22.00**

**WEB OF SCIENCE:**

1. ((ALL=(Colonic Neoplasms) OR ALL=(Colorectal neoplasms) OR ALL=(Colorectal tumor) OR ALL=(Colorectal tumour) OR ALL=(Colonic tumour) OR ALL=(Colonic tumor)) AND (ALL=(Minimally Invasive Surgical Procedures) OR ALL=(Laparoscopic surgery) OR ALL=(Minimally invasive surgery)) AND (ALL=(robotics) OR ALL=(robotic surgery)))

**WOS:**  
**TOTAL – 441**  
**ARTICLE – 335**

- Article335
- Review Article91
- Proceeding Paper19
- Editorial Material9
- Early Access8
- Correction2
- Letter2
- Book Chapters1

2020-2023: TOTAL - 229

- Article160
- Review Article52
- Early Access8
- Editorial Material4
- Proceeding Paper3
- Correction2

2. ((ALL=(COLONIC CANCER)) AND ALL=(ROBOTIC SURGERY)) AND ALL=(LAPAROSCOPIC SURGERY)

TOTAL- 117  
ARTICLE - 92

2020-2023 TOTAL - 40  
Article28  
Review Article10  
Early Access1  
Editorial Material1

3. ((ALL=(COLORECTAL CANCER)) AND ALL=(ROBOTIC SURGERY)) AND ALL=(LAPAROSCOPIC SURGERY)  
TOTAL – 1241

ARTICLE- 914

2020-2024 – TOTAL 572

- Article410
- Review Article139
- Early Access33
- Letter9
- Editorial Material8
- Proceeding Paper7
- Meeting Abstract4
- Book Chapters2
- Correction2

4. ((ALL=(COLORECTAL CANCER)) AND (ALL=(ROBOTIC SURGERY) OR ALL=(Robotics)) AND (ALL=(LAPAROSCOPIC SURGERY) OR ALL=(Minimally Invasive Surgical Procedures) OR ALL=( Minimally invasive surgery)))

TOTAL- 644

ARTICLE – 465

2020-2024 TOTAL 644

- Article465
- Review Article153
- Early Access35
- Letter10
- Editorial Material8
- Proceeding Paper7
- Correction4
- Meeting Abstract4
- Book Chapters2

SCOPUS:

1. ( ( ALL ( "Colonic Neoplasms" ) OR ALL ( "Colorectal neoplasms" ) OR ALL ( "Colorectal tumor" ) OR ALL ( "Colorectal tumour" ) OR ALL ( "Colonic tumour" ) OR ALL ( "Colonic tumor" ) ) AND ( ALL ( "Minimally Invasive Surgical Procedures" ) OR ALL ( "Laparoscopic surgery" ) OR ALL ( "Minimally invasive surgery" ) ) AND ( ALL ( "robotics" ) OR ALL ( "robotic surgery" ) ) )

TOTAL- 1253

ARTICLE- 843

2020-2024  
TOTAL -628  
ARTICLE -437

2. ALL ( "COLONIC CANCER" ) AND ALL ( "LAPAROSCOPIC SURGERY" ) AND ALL ( "ROBOTIC SURGERY" )

TOTAL 228  
ARTICOLE 148

2020-2024  
TOTAL – 118  
ARTICOLE- 70

3. ( ( ALL ( "COLORECTAL CANCER" ) ) AND ALL ( "ROBOTIC SURGERY" ) ) AND ALL ( "LAPAROSCOPIC SURGERY" )

TOTAL – 2180  
ARTICLE-1383

2020-2024  
TOTAL- 1108  
ARTICLE- 746

4. ALL("COLORECTAL CANCER") AND (ALL("ROBOTIC SURGERY") OR ALL("Robotics")) AND (ALL("LAPAROSCOPIC SURGERY") OR ALL("Minimally Invasive Surgical Procedures") OR ALL("Minimally invasive surgery"))

TOTAL -4951  
ARTICLE- 3113

2020-2024  
TOTAL- 2504  
ARTICLE-1684

1. ((Colonic Neoplasms) OR (Colorectal neoplasms) OR (Colorectal tumor) OR (Colorectal tumour) OR (Colonic tumour) OR Colonic tumor)) AND ((Minimally Invasive Surgical Procedures) OR (Laparoscopic surgery) OR (Minimally invasive surgery)) AND ((robotics) OR (robotic surgery))

TOTAL – 1670  
ARTICLE - 49

2020-2024:  
TOTAL-864

ARTICLE- 19

SCIENCE DIRECT

1. Colorectal cancer, laparoscopic surgery, robotic surgery

TOTAL- 302

ARTICLE- 175

2020-2024

TOTAL - 143

ARTICLE -80

PubMed

((Colonic cancer) OR (Colorectal cancer) OR (Colonic Neoplasms) OR (Colorectal neoplasms) OR (Colorectal tumor) OR (Colorectal tumour) OR (Colonic tumour) OR (Colonic tumor)) AND ((Minimally Invasive Surgical Procedures) OR (Laparoscopic surgery) OR (Minimally invasive surgery)) AND ((robotics) OR (robotic surgery))

Total- 1941

Article- 56

2020-2024

Total- 1034

Article- 24
