# Supplementary material for: Systematic Review and Meta-Analysis of Laparoscopic versus Robotic-Assisted Surgery for Colon Cancer: Efficacy, Safety, and Outcomes—A Focus on Studies from 2020–2024
Source: MDPI journal article supplement (doi:10.3390/cancers16081552), 2024-04-18
Supplement: s1 [file s1]

| Study                                          | Q1 | Q2 | Q3 | Q4 | Q5 | Q6 | Q7 | Q8 | Q9 | Q10 | Q11 | %<br>YES | RISK | RISK     |
|------------------------------------------------|----|----|----|----|----|----|----|----|----|-----|-----|----------|------|----------|
| Jan Grosek, et al.<br>Slovenia,2021[22]        | Y  | U  | U  | Y  | Y  | Y  | Y  | U  | U  | U   | Y   | 55%      |      | MODERATE |
| Niclas Dohrn et al.<br>Denmark,2021 [23]       | Y  | U  | U  | Y  | Y  | Y  | Y  | N  | N  | N   | Y   | 55%      | 5    | MODERATE |
| Yaqi Zhang et al.<br>China,2022 [24]           | Y  | U  | Y  | Y  | Y  | Y  | Y  | Y  | U  | U   | Y   | 73%      | 3    | LOW      |
| J. S. Khan et al.<br>UK,2021 [25]              | Y  | Y  | Y  | Y  | Y  | Y  | Y  | Y  | U  | U   | Y   | 82%      | 2    | LOW      |
| Yue Tian et al.<br>China, 2023 [26]            | Y  | U  | U  | Y  | Y  | Y  | Y  | Y  | Y  | U   | Y   | 73%      |      | LOW      |
| Nadia Sorgato et al.<br>Italy,2022 [27]        | Y  | U  | U  | Y  | Y  | Y  | Y  | Y  | Y  | U   | Y   | 73%      |      | LOW      |
| Alessandra Di Lascia et al.<br>Italy,2020 [28] | Y  | Y  | Y  | U  | U  | Y  | Y  | U  | U  | U   | Y   | 55%      |      | MODERATE |
| Zhixiang Huang et al.<br>China, 2022 [29]      | Y  | Y  | Y  | Y  | Y  | Y  | Y  | Y  | U  | U   | Y   | 82%      |      | LOW      |
| Valentina Ferri et al.<br>Spain, 2020 [30]     | Y  | U  | U  | Y  | Y  | Y  | Y  | Y  | Y  | U   | Y   | 73%      |      | LOW      |
| Fulvio Tagliabue et al.<br>Italy, 2020 [31]    | Y  | U  | U  | Y  | Y  | Y  | Y  | Y  | U  | U   | Y   | 64%      | 4    | MODERATE |
| V. Ozben et al.<br>Turkey, 2020 [32]           | Y  | U  | U  | Y  | Y  | Y  | Y  | Y  | Y  | U   | Y   | 73%      |      | LOW      |
| Filipe Pacheco et al.<br>USA, 2023 [33]        | Y  | U  | U  | Y  | Y  | Y  | Y  | Y  | U  | U   | Y   | 64%      |      | MODERATE |
| Huichao Zeng et al.<br>China, 2023 [34]        | Y  | Y  | Y  | Y  | Y  | Y  | Y  | Y  | Y  | Y   | Y   | 100%     |      | LOW      |
| Maolin Xu et al.<br>China, 2020 [35]           | Y  | Y  | Y  | Y  | Y  | Y  | Y  | Y  | U  | U   | Y   | 82%      |      | LOW      |
| Tung-Cheng Chang et al.<br>China,2021 [36]     | Y  | Y  | Y  | Y  | Y  | Y  | Y  | U  | U  | U   | Y   | 73%      |      | LOW      |
| Ho Segun Kim et al.<br>Korea, 2021 [37]        | Y  | Y  | Y  | Y  | Y  | Y  | Y  | U  | U  | U   | Y   | 73%      |      | LOW      |
| V. Maertens et al.                             | Y  | Y  | Y  | U  | Y  | Y  | Y  | Y  | U  | U   | Y   | 73%      |      | LOW      |

|                                                 |       |   |   |   |   |   |   |   |   |   |   |     |  |          |
|-------------------------------------------------|-------|---|---|---|---|---|---|---|---|---|---|-----|--|----------|
| UK, 2022 [38]                                   |       |   |   |   |   |   |   |   |   |   |   |     |  |          |
| Marlou F. M. Sterk et al. Netherland, 2023 [39] | Y     | Y | Y | U | Y | Y | Y | U | U | U | Y | 64% |  | MODERATE |
| Emile Farah et al. USA, 2023 [40]               | ..... |   |   |   |   |   |   |   |   |   |   |     |  |          |
| Sung Uk Bae et al. Korea, 2022 [41]             | ..... |   |   |   |   |   |   |   |   |   |   |     |  |          |
| Graziano Ceccarelli et al., Italy, 2020 [42]    | ..... |   |   |   |   |   |   |   |   |   |   |     |  |          |

1. Were the two groups similar and recruited from the same population?
2. Were the exposures measured similarly to assign people to both exposed and unexposed groups?
3. Was the exposure measured in a valid and reliable way?
4. Were confounding factors identified?
5. Were strategies to deal with confounding factors stated?
6. Were the groups/participants free of the outcome at the start of the study (or at the moment of exposure)?
7. Were the outcomes measured in a valid and reliable way?
8. Was the follow up time reported and sufficient to be long enough for outcomes to occur?
9. Was follow up complete, and if not, were the reasons to loss to follow up described and explored?
10. Were strategies to address incomplete follow up utilized?

11. Was appropriate statistical analysis used?
