# Supplementary material for: Systematic Review and Meta-Analysis of Laparoscopic versus Robotic-Assisted Surgery for Colon Cancer: Efficacy, Safety, and Outcomes—A Focus on Studies from 2020–2024
Source: MDPI journal article supplement (doi:10.3390/cancers16081552), 2024-04-18
Supplement: s1 [file s1]

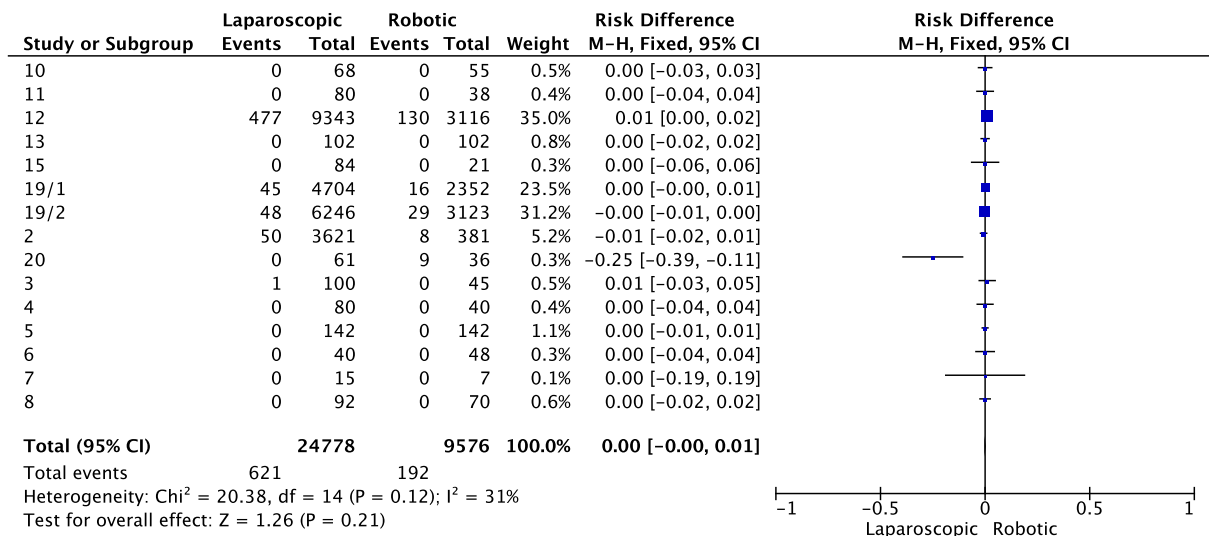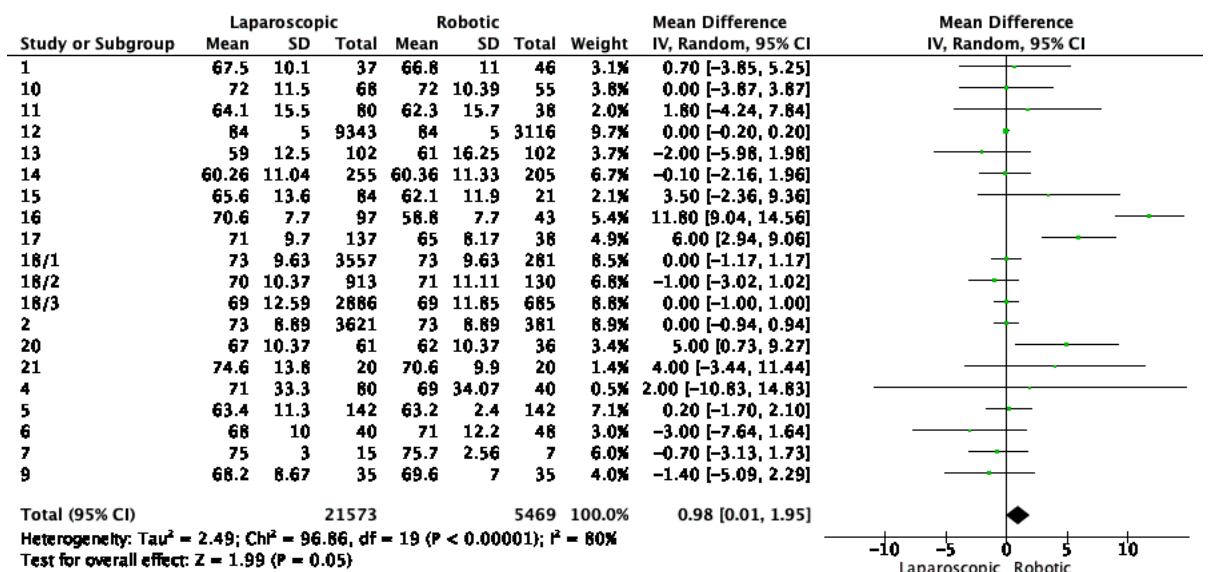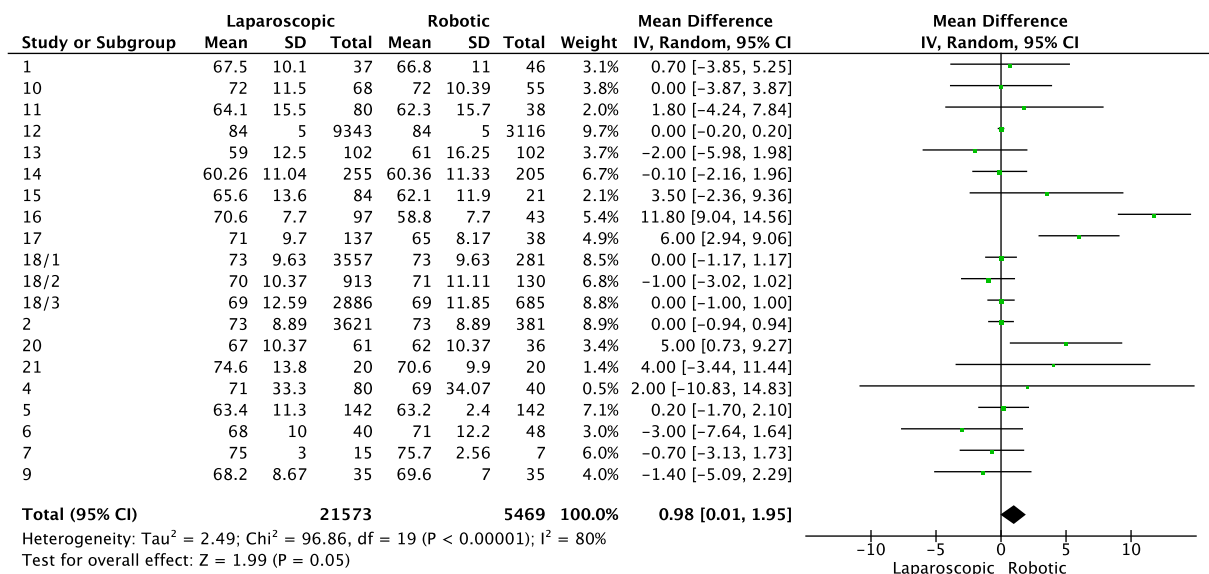

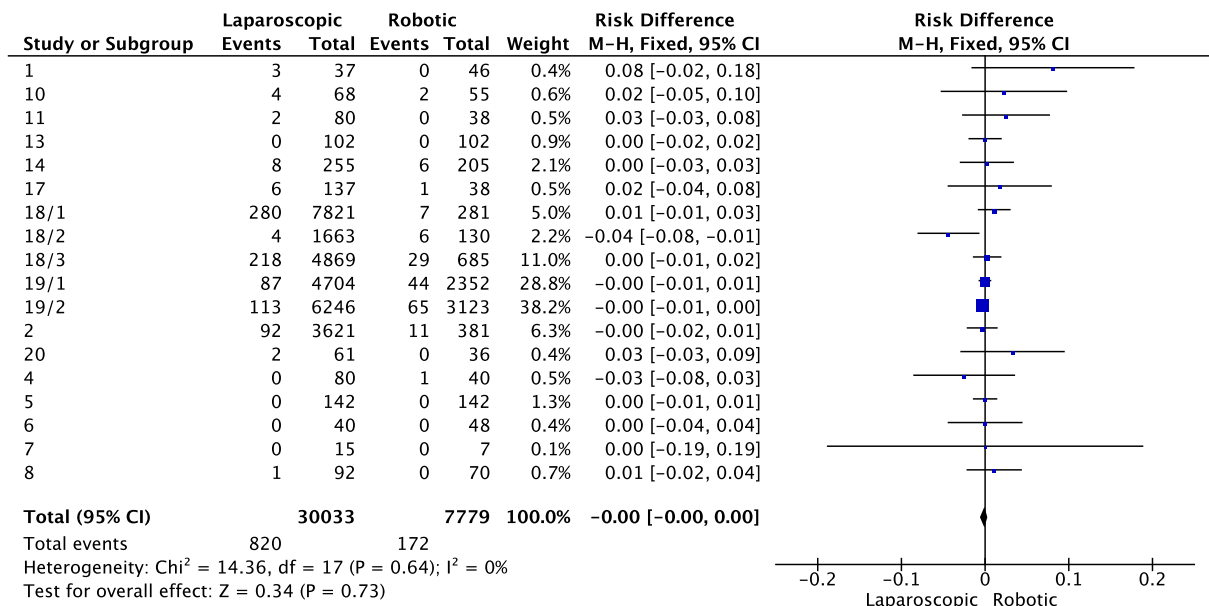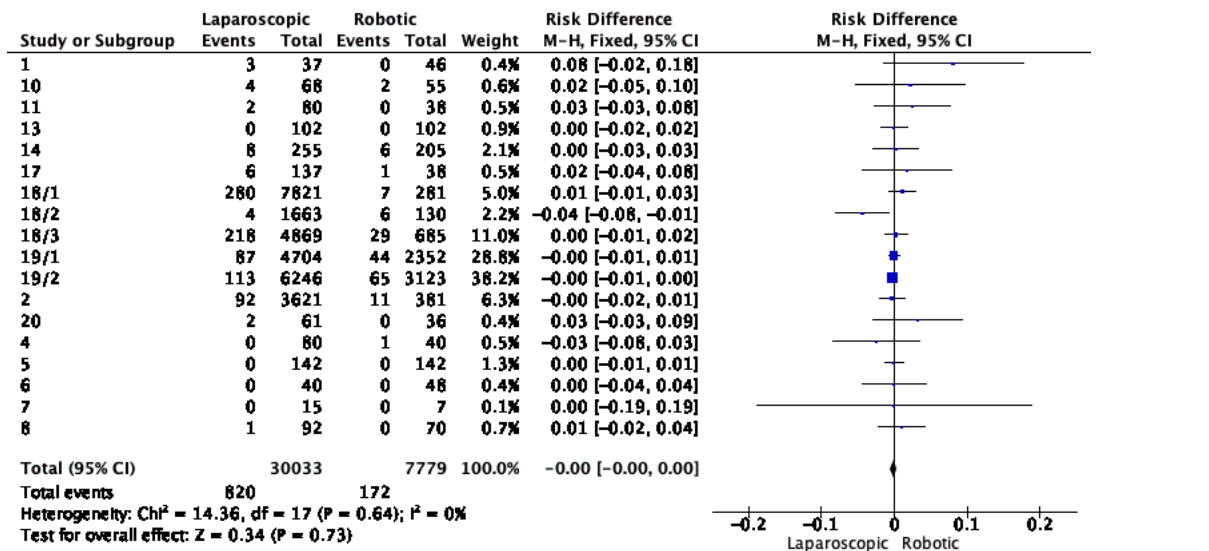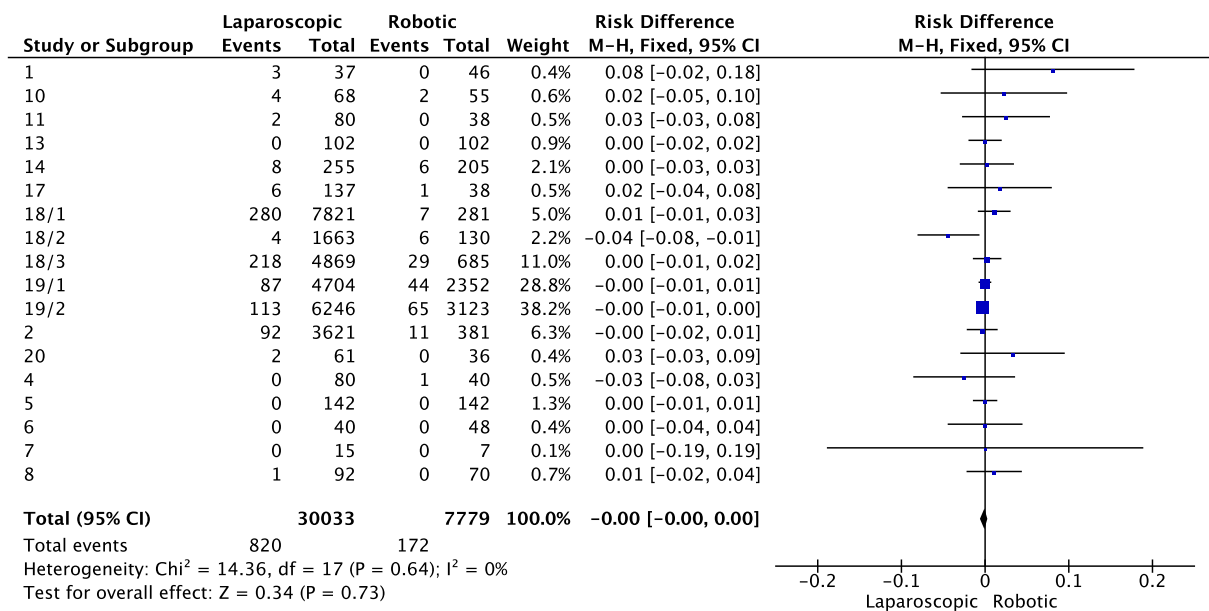

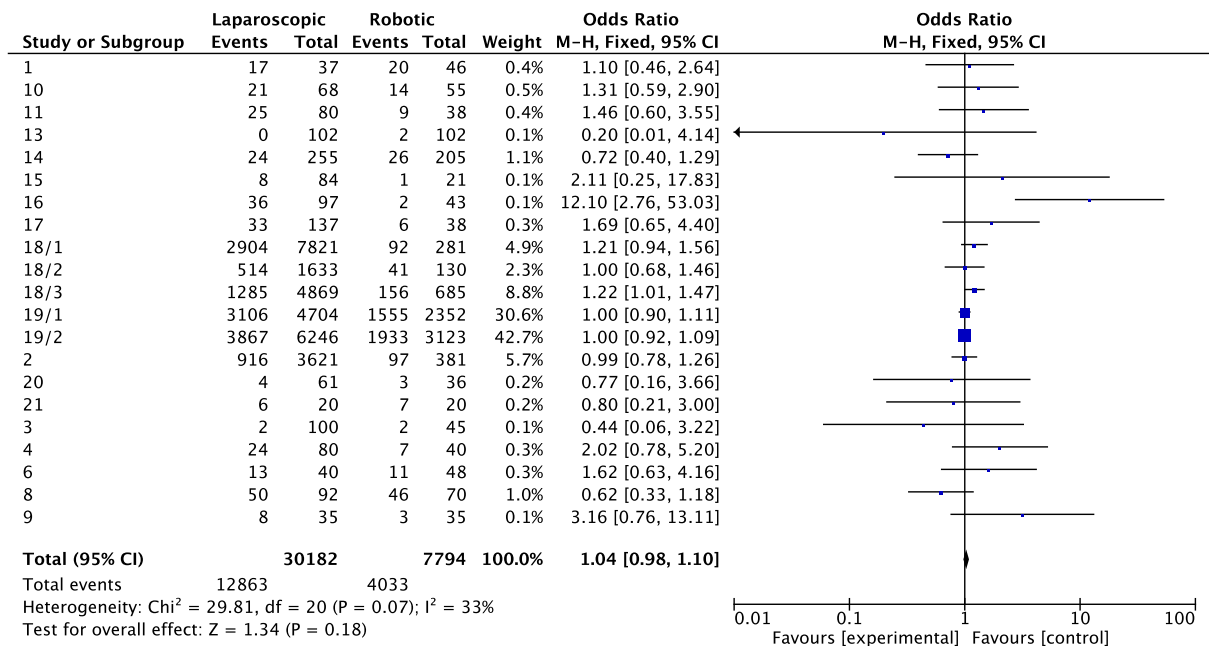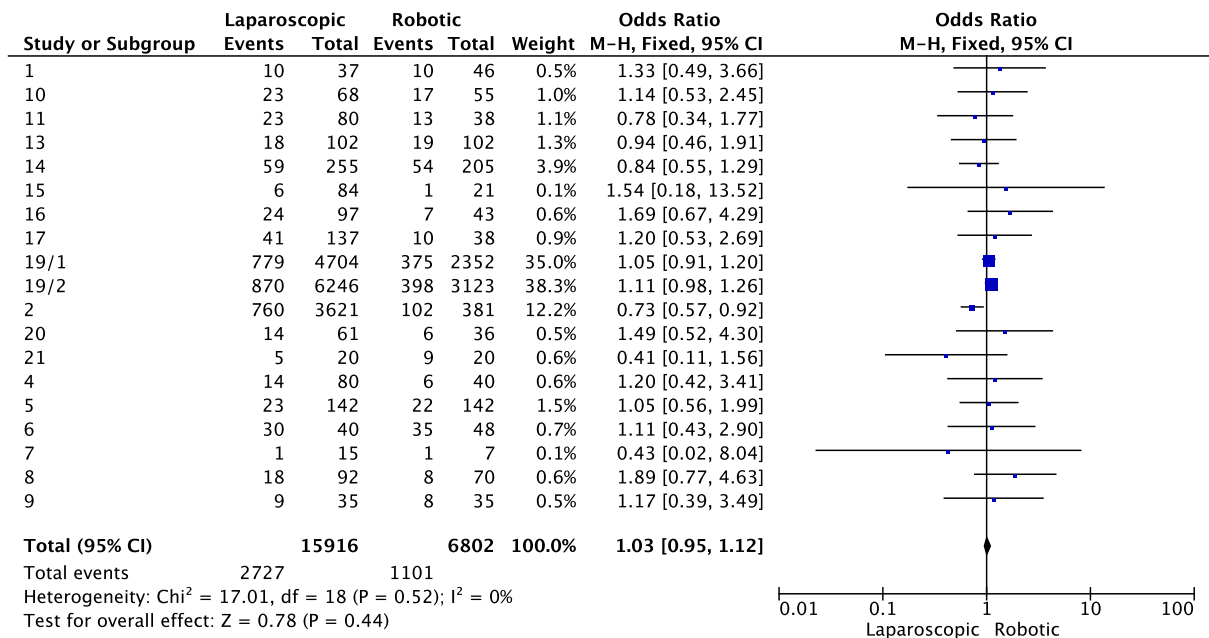

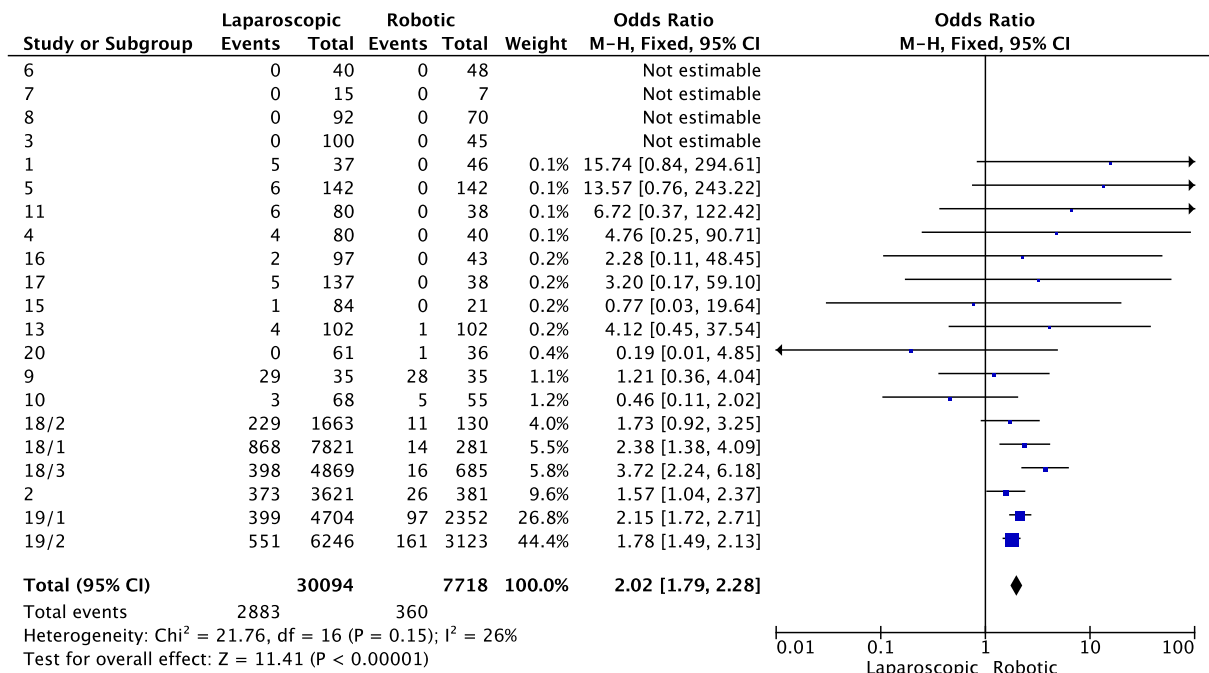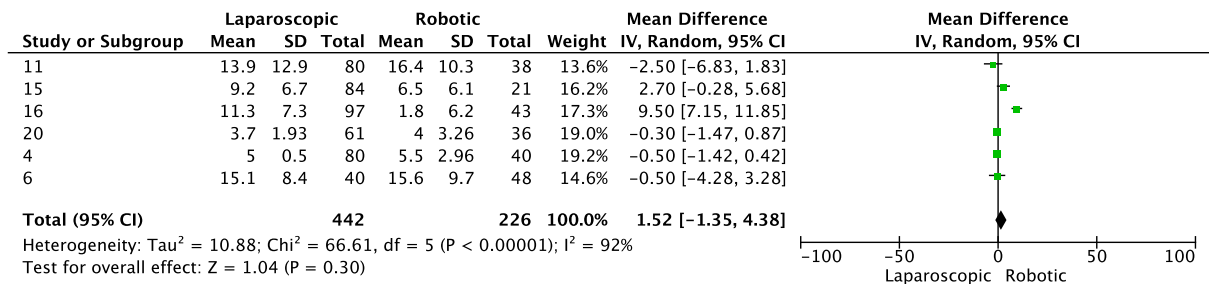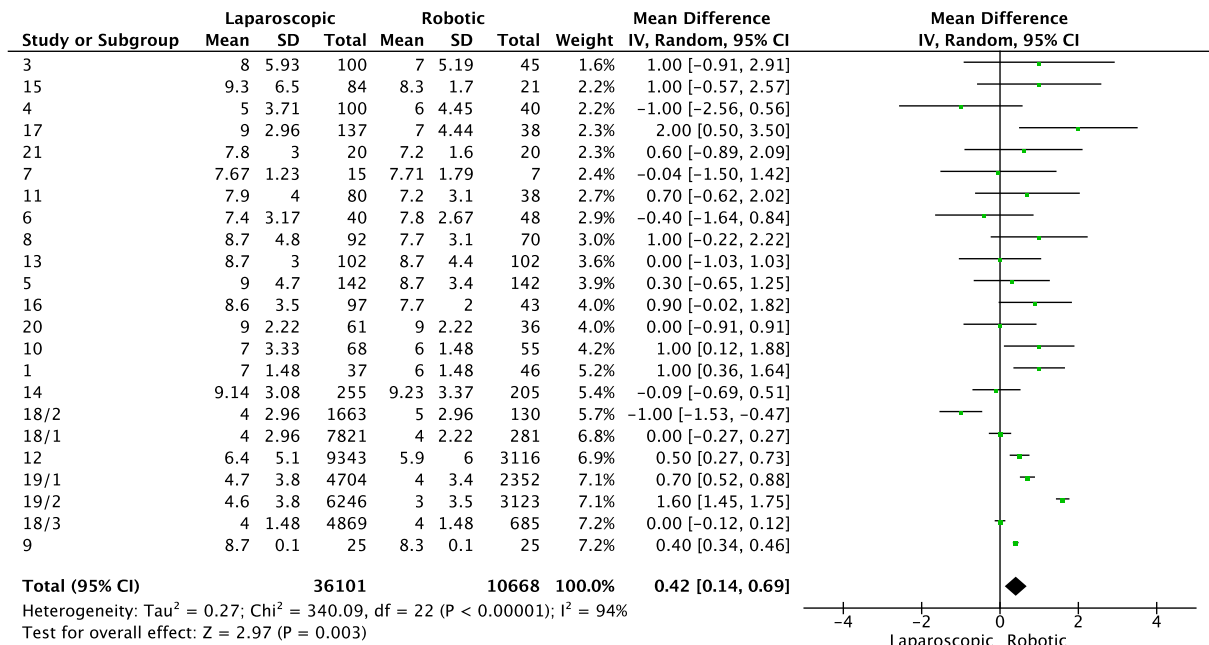

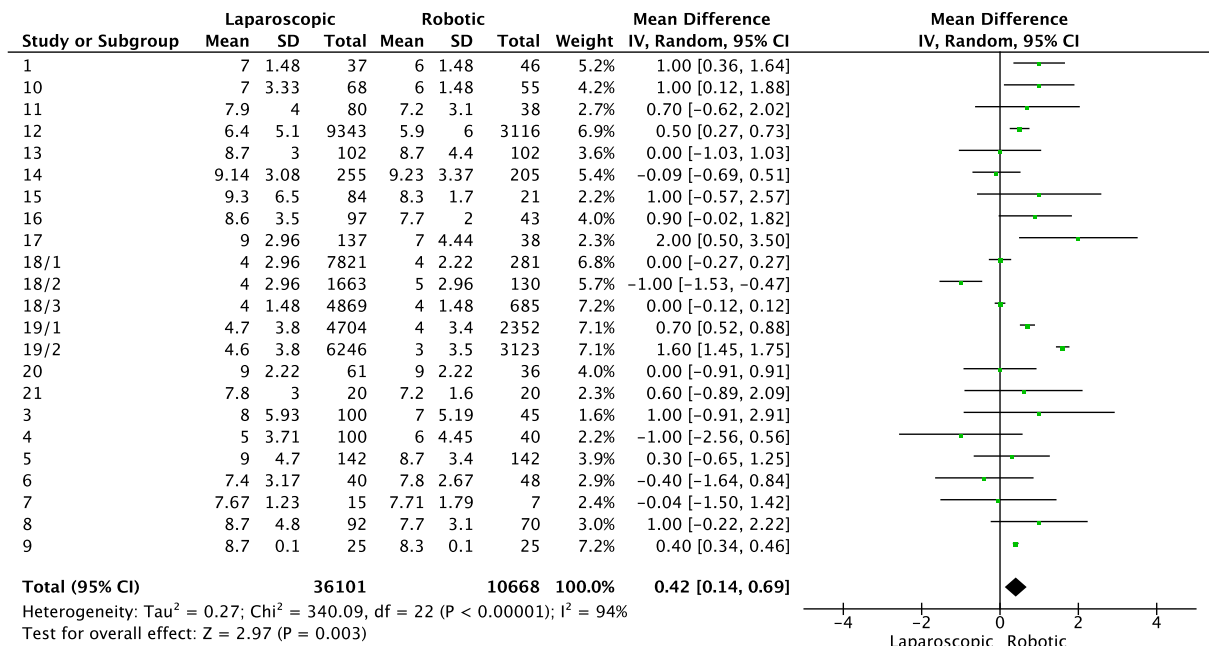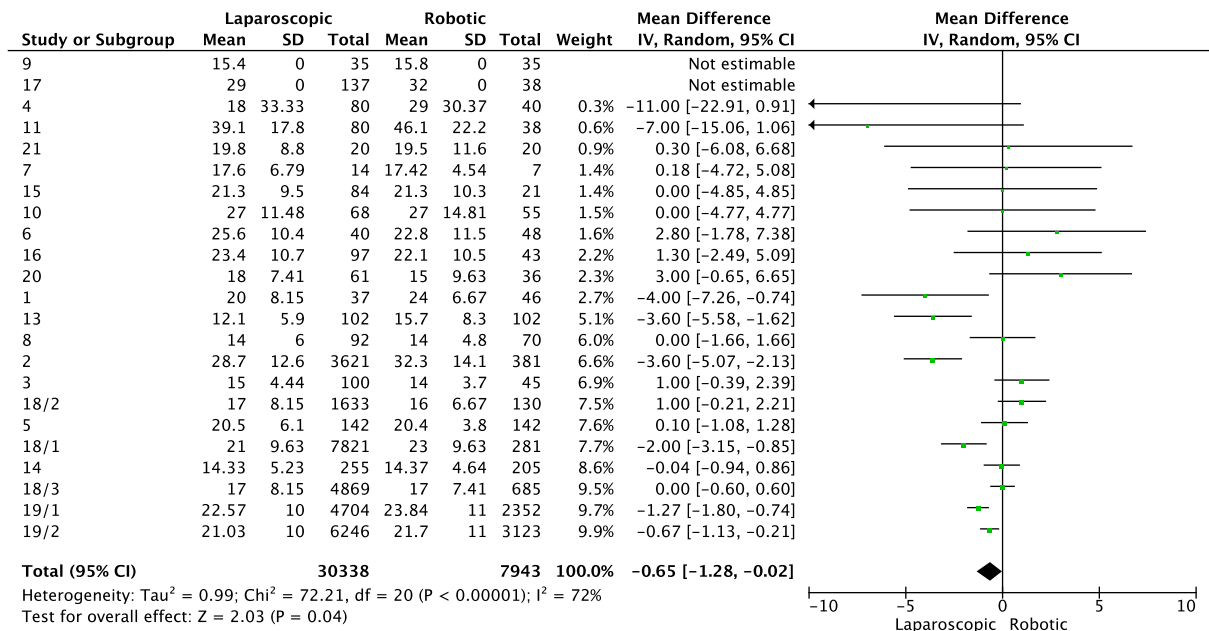

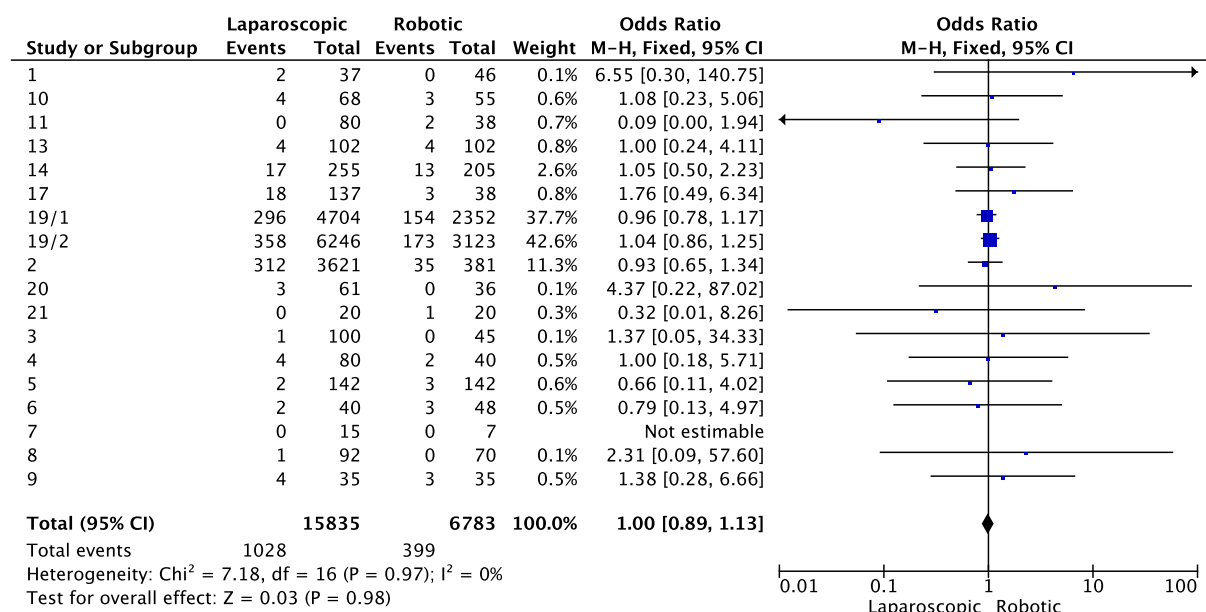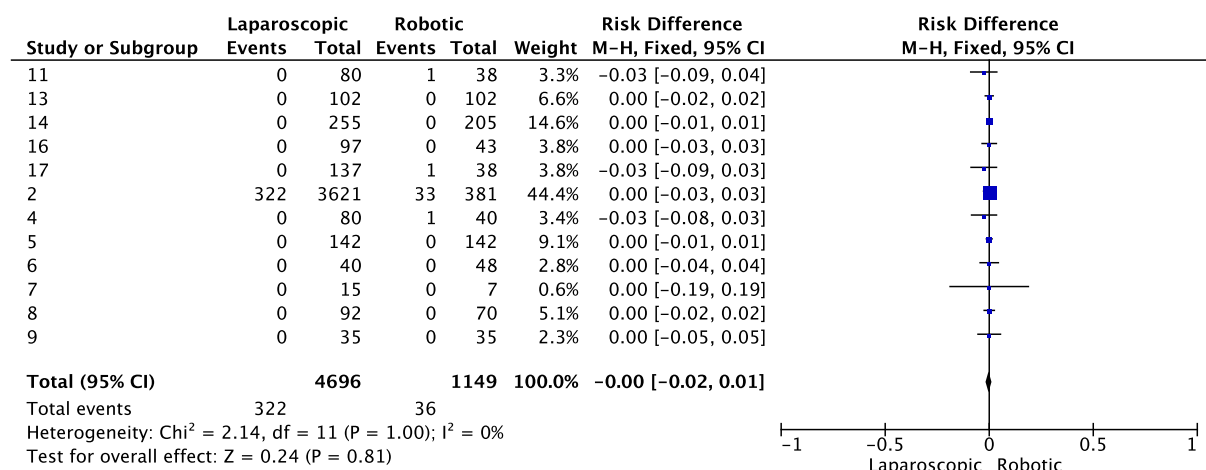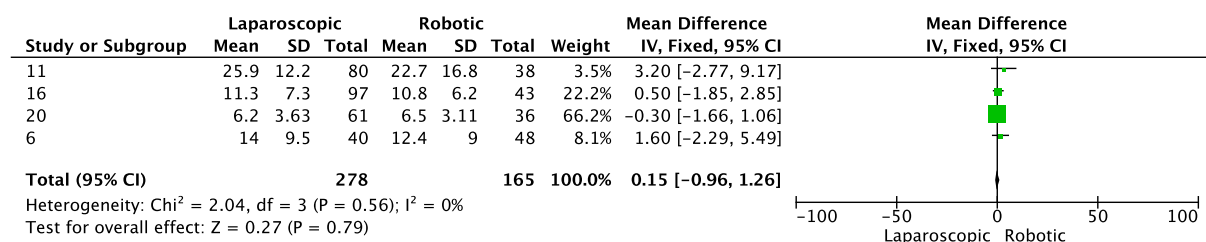

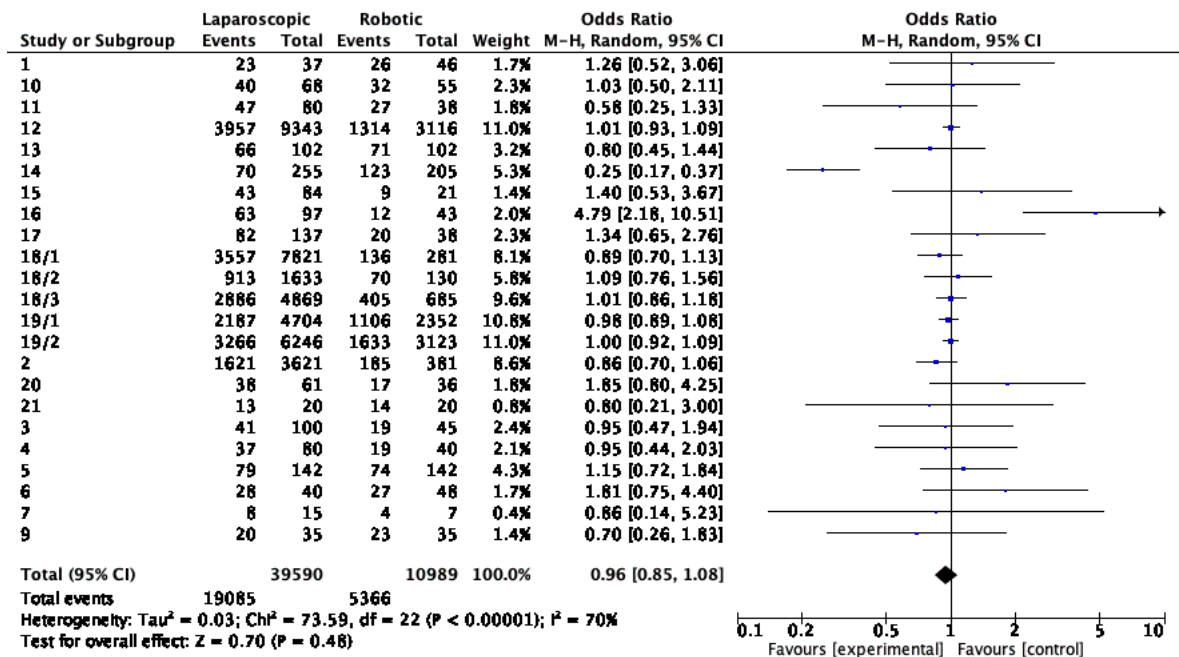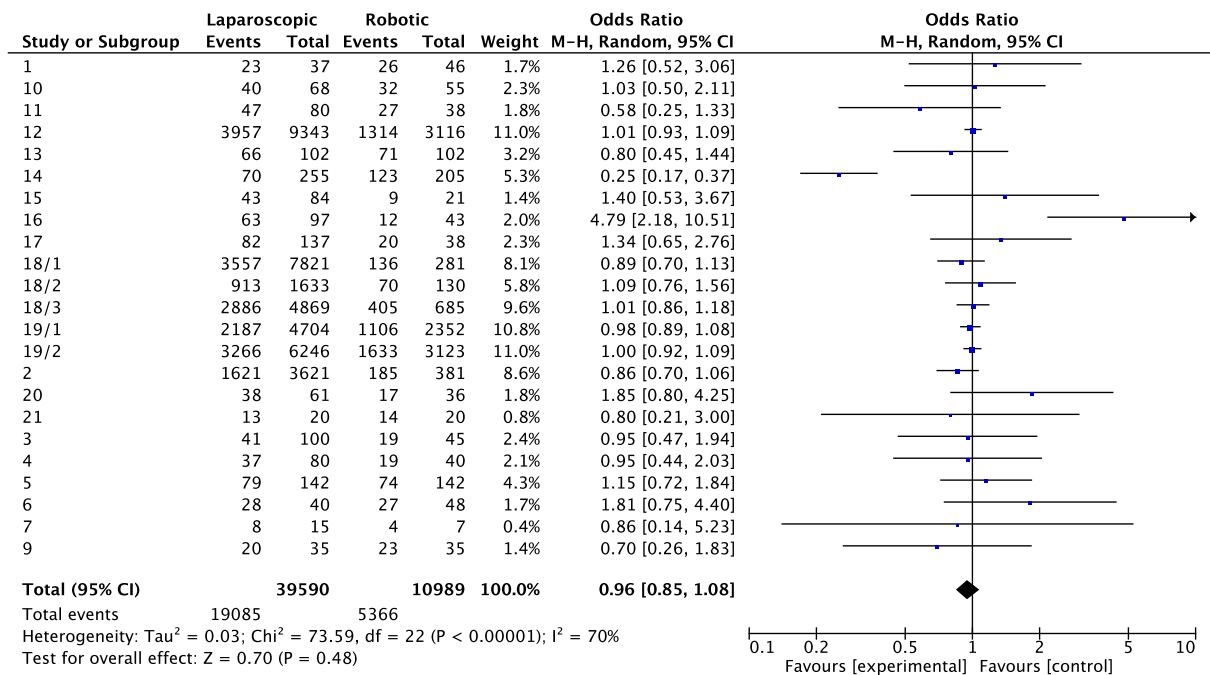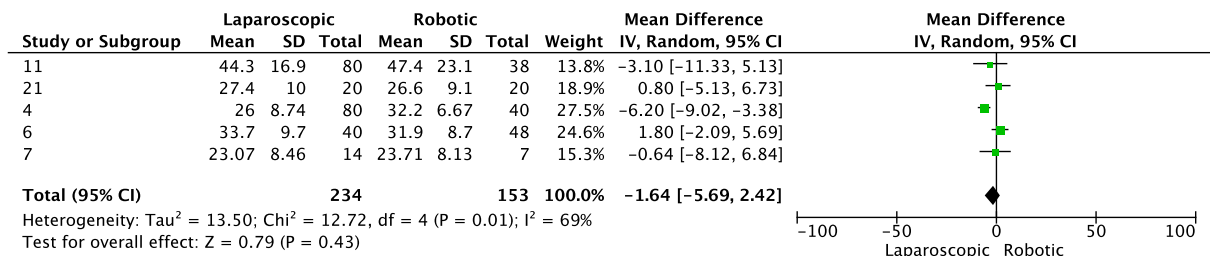

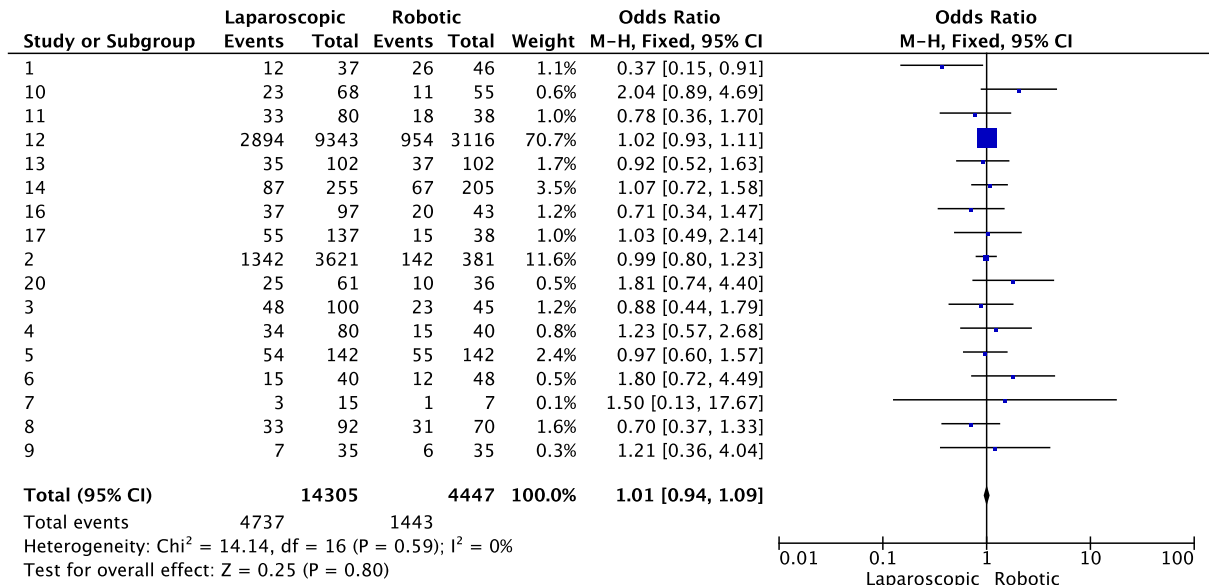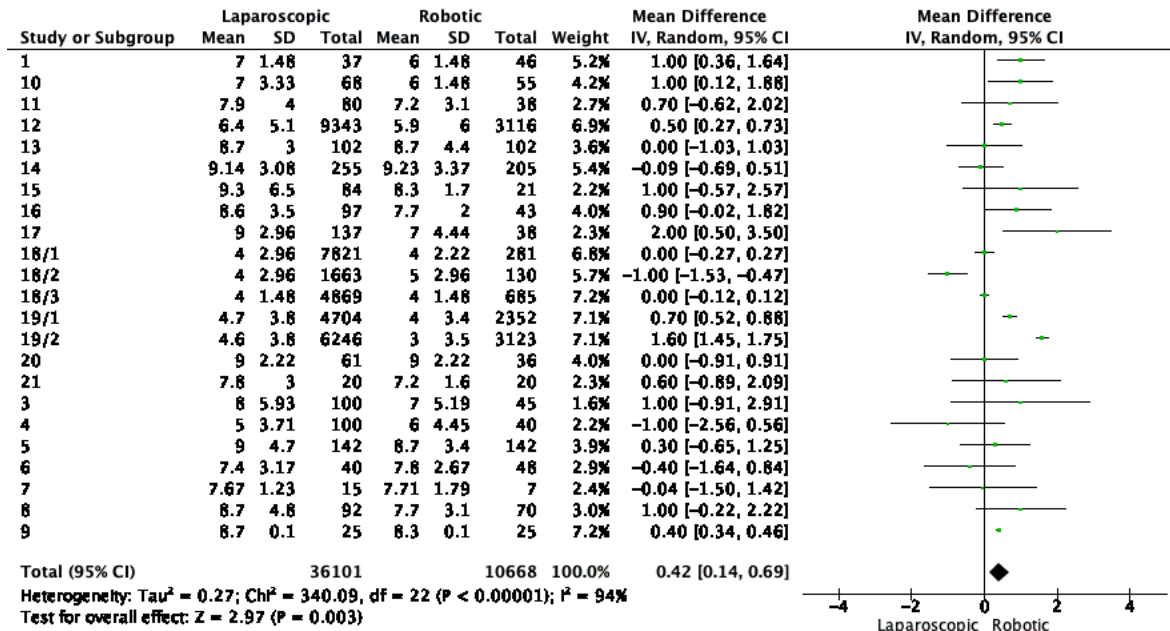



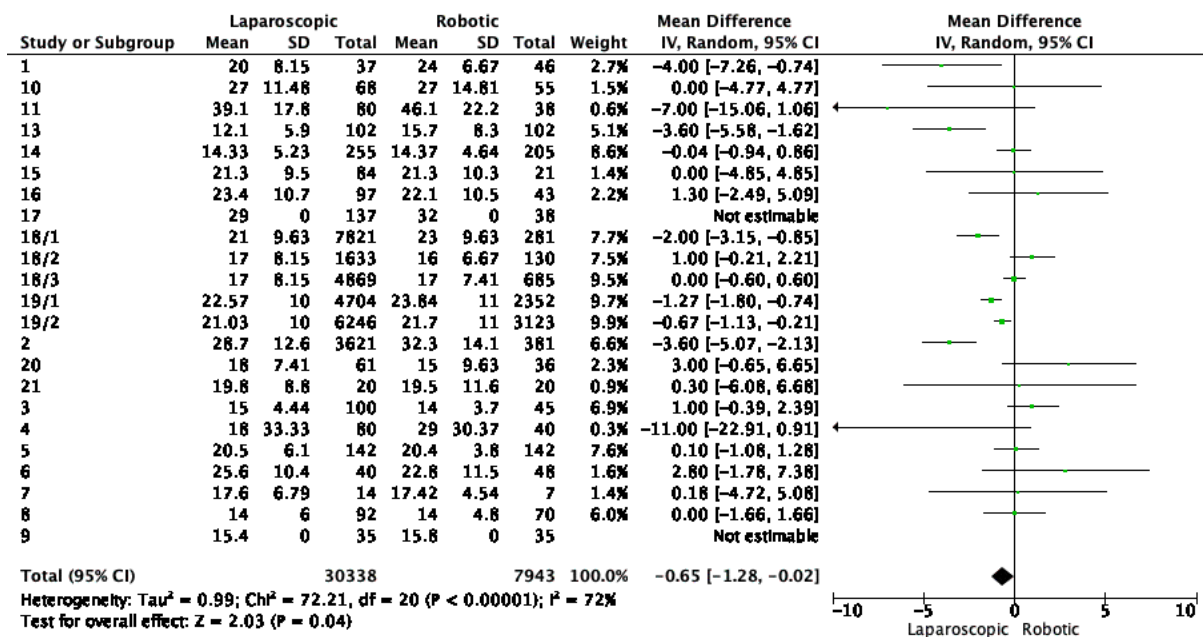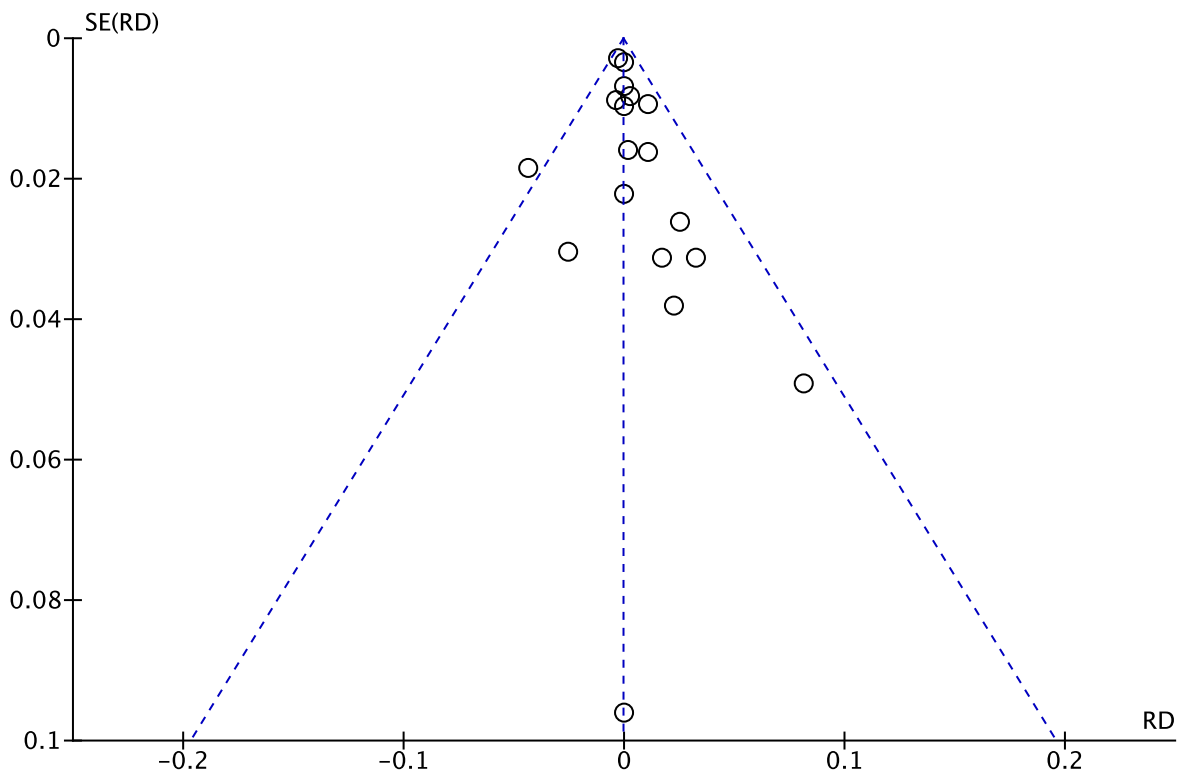

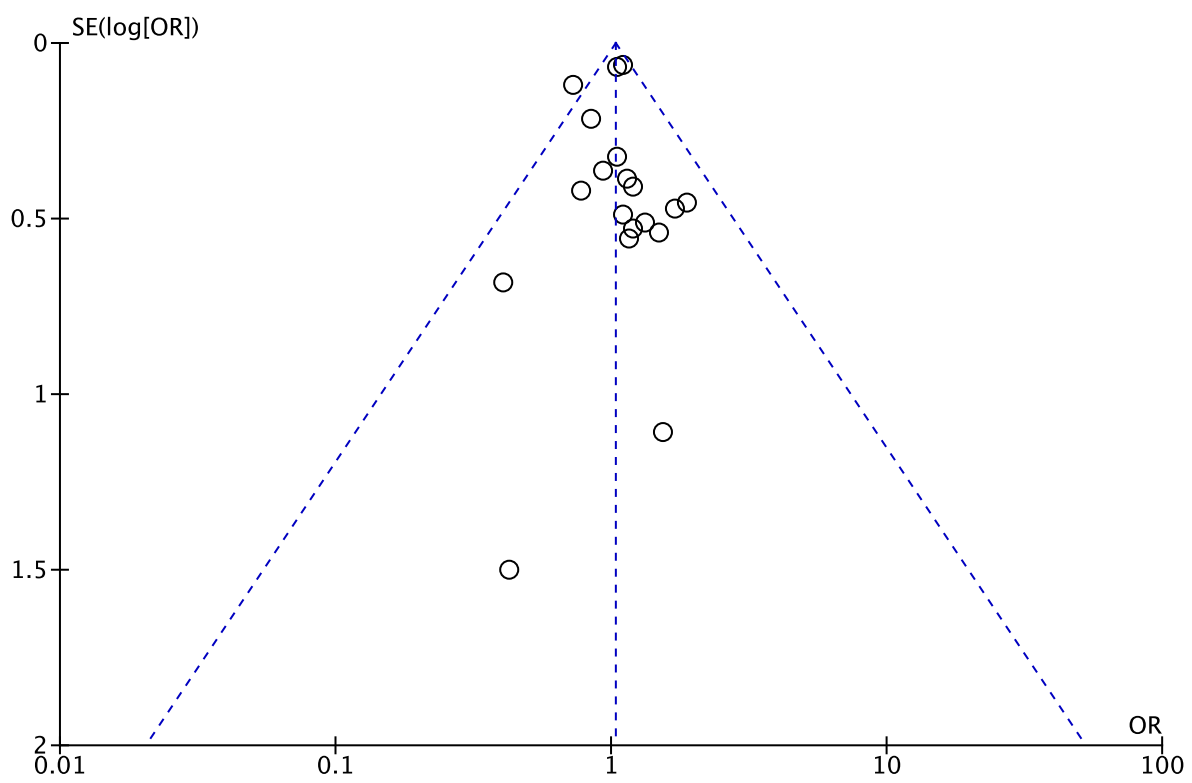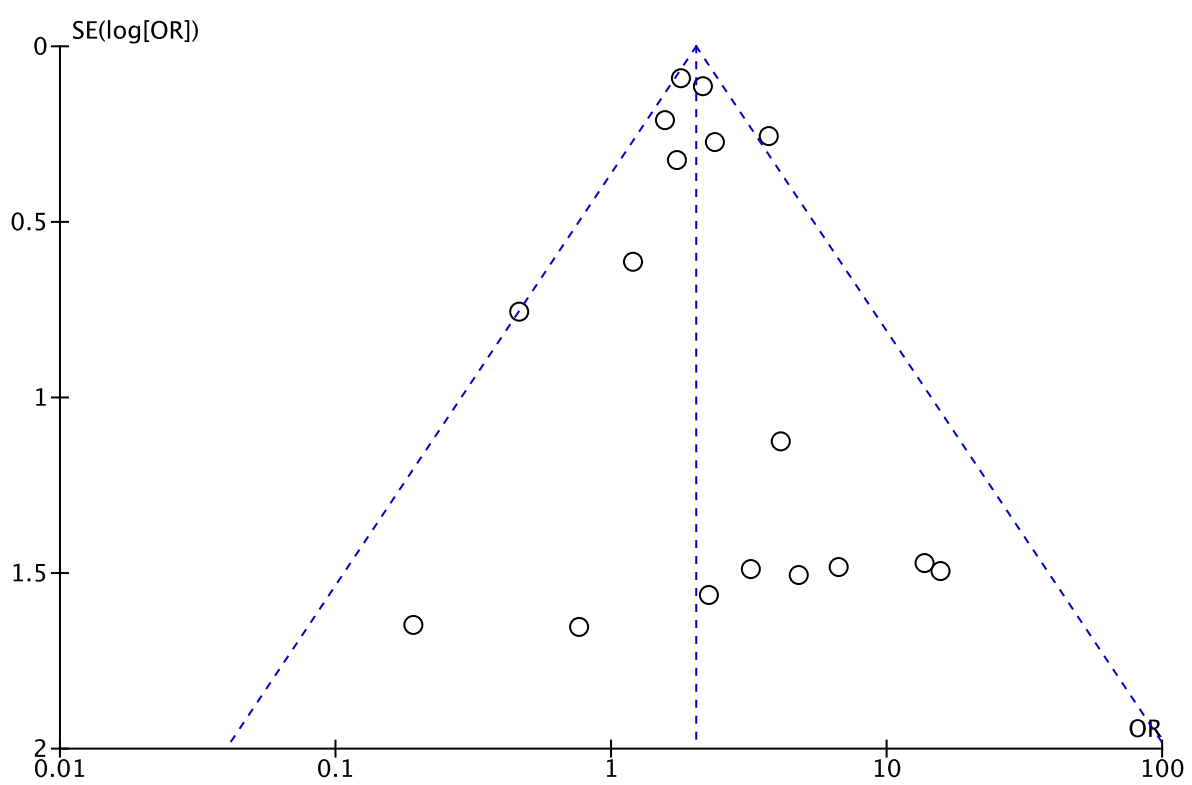

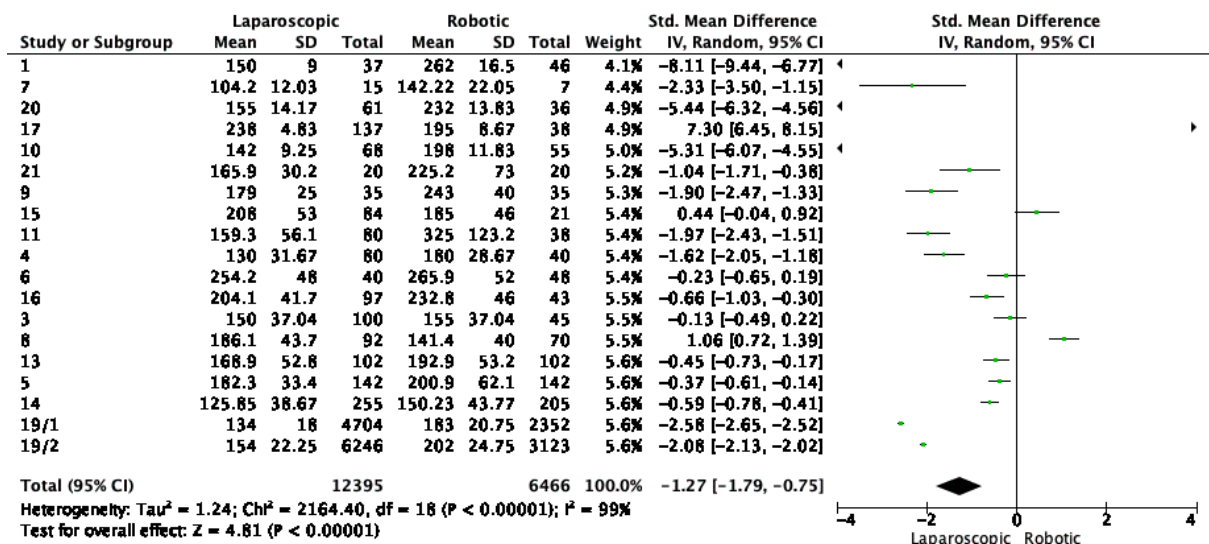

## CONVERSION

### Classical Meta-Analysis

#### Fixed and Random Effects

|                                    | Q        | df | p      |
|------------------------------------|----------|----|--------|
| Omnibus test of Model Coefficients | 12.012   | 1  | < .001 |
| Test of Residual Heterogeneity     | 1308.755 | 20 | < .001 |

Note. *p* -values are approximate.

Note. The model was estimated using Restricted ML method.

#### Coefficients

|           | Estimate | Standard Error | z     | p      |
|-----------|----------|----------------|-------|--------|
| intercept | 3.030    | 0.874          | 3.466 | < .001 |

Note. Wald test.

#### Residual Heterogeneity Estimates

|           | Estimate |
|-----------|----------|
| $\tau^2$  | 15.102   |
| $\tau$    | 3.886    |
| $I^2$ (%) | 99.983   |
| $H^2$     | 5768.951 |

#### Rank correlation test for Funnel plot asymmetry

|           | Kendall's $\tau$ | p     |
|-----------|------------------|-------|
| Rank test | -0.029           | 0.882 |

Regression test for Funnel plot asymmetry ("Egger's test")

|     | z     | p     |
|-----|-------|-------|
| sei | 2.733 | 0.006 |

Plot

Funnel Plot

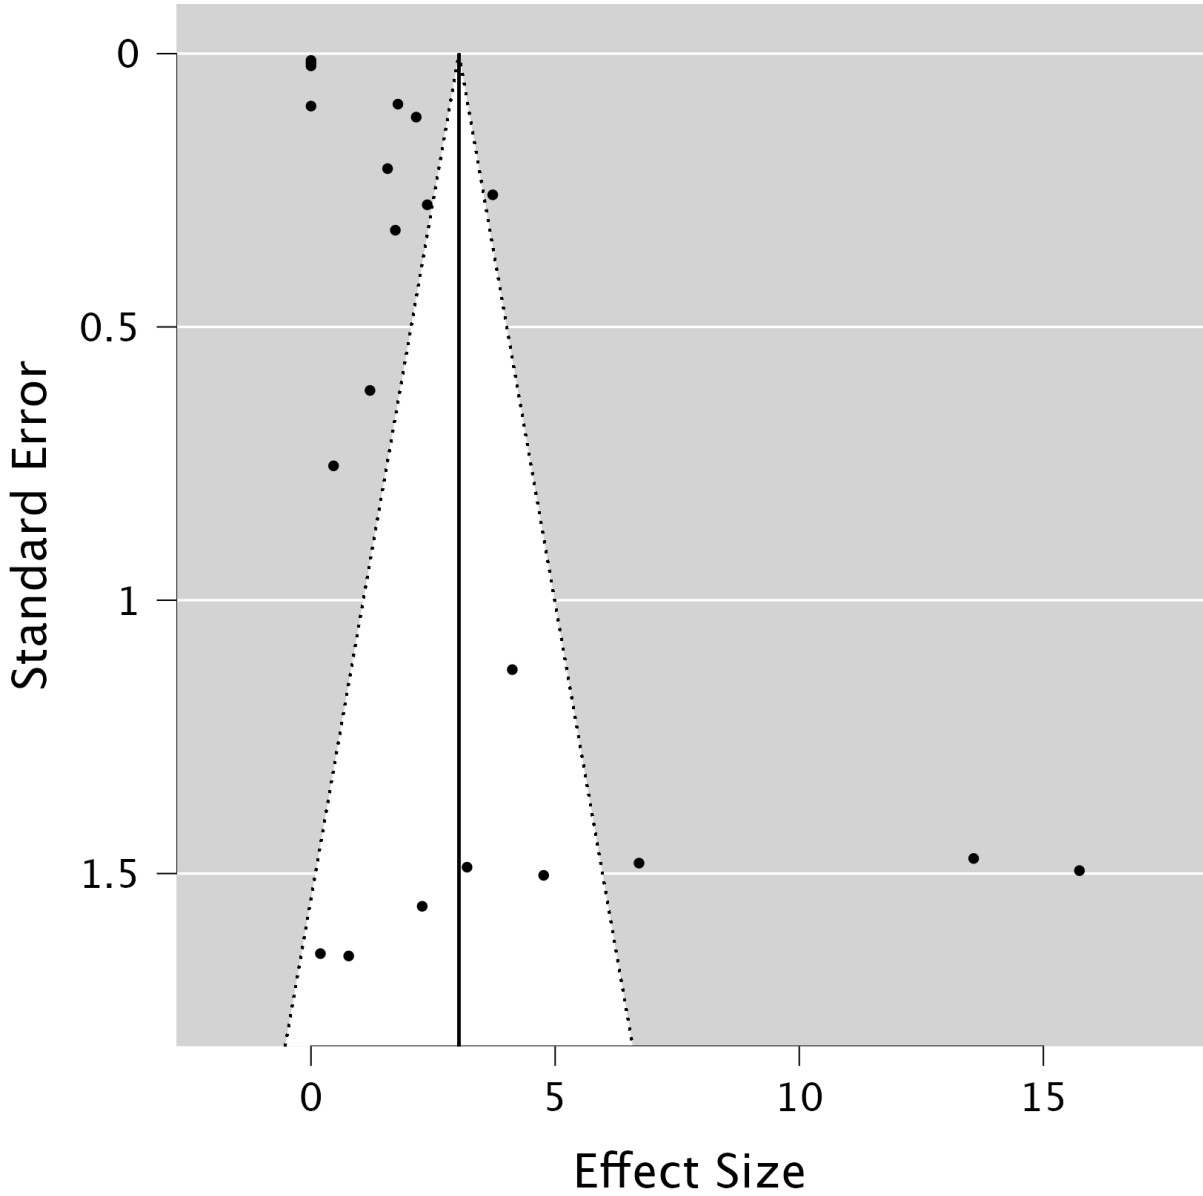

PET-PEESE

Model Tests

### Test of Effect

|     | t      | df | p     |
|-----|--------|----|-------|
| PET | -1.242 | 19 | 0.229 |

### Test of Publication Bias

|     | t     | df | p      |
|-----|-------|----|--------|
| PET | 4.164 | 19 | < .001 |

### Estimates

#### Mean Estimates ( $\mu$ )

|       | Estimate | Standard Error | t      | df | p     | 95% Confidence Interval |       |
|-------|----------|----------------|--------|----|-------|-------------------------|-------|
|       |          |                |        |    |       | Lower                   | Upper |
| PET   | -0.076   | 0.061          | -1.242 | 19 | 0.229 | -0.196                  | 0.044 |
| PEESE | 0.038    | 0.069          | 0.555  | 19 | 0.585 | -0.097                  | 0.173 |

## Robust Bayesian Meta-Analysis

### Summary

#### Model Summary

|                  | Models | P(M)  | P(M data) | Inclusion | BF          |
|------------------|--------|-------|-----------|-----------|-------------|
| Effect           | 18/36  | 0.500 | 0.533     |           | 1.140       |
| Heterogeneity    | 18/36  | 0.500 | 1.000     | 1.503     | $10^{+125}$ |
| Publication bias | 32/36  | 0.500 | 0.977     |           | 41.566      |

#### Model Averaged Estimates

|                          | Mean  | Median | 95% CI |       |
|--------------------------|-------|--------|--------|-------|
|                          |       |        | Lower  | Upper |
| Effect size ( $\mu$ )    | 0.358 | 0.000  | -0.621 | 1.945 |
| Heterogeneity ( $\tau$ ) | 3.295 | 3.207  | 2.213  | 4.850 |

*Note.* The estimates are summarized on the none scale (priors were specified on the none scale).

#### Model Averaged Weights ( $\omega$ )

| <i>p</i> -values interval |       | Mean  | Median | 95% CI |       |
|---------------------------|-------|-------|--------|--------|-------|
| Lower                     | Upper |       |        | Lower  | Upper |
| 0.000                     | 0.025 | 1.000 | 1.000  | 1.000  | 1.000 |
| 0.025                     | 0.050 | 1.000 | 1.000  | 1.000  | 1.000 |
| 0.050                     | 0.100 | 0.997 | 1.000  | 1.000  | 1.000 |
| 0.100                     | 0.950 | 0.994 | 1.000  | 1.000  | 1.000 |

**Model Averaged Weights ( $\omega$ )**

| <i>p</i> -values interval |       | Mean  | Median | 95% CI |       |
|---------------------------|-------|-------|--------|--------|-------|
| Lower                     | Upper |       |        | Lower  | Upper |
| 0.950                     | 0.975 | 0.994 | 1.000  | 1.000  | 1.000 |
| 0.975                     | 1.000 | 0.994 | 1.000  | 1.000  | 1.000 |

*Note.* (Estimated publication weights omega correspond to one-sided p-values.)

**Model Averaged PET-PEESE Estimates**

|       | Mean  | Median | 95% CI |       |
|-------|-------|--------|--------|-------|
|       |       |        | Lower  | Upper |
| PET   | 2.039 | 2.474  | 0.000  | 4.758 |
| PEESE | 0.683 | 0.000  | 0.000  | 3.008 |

## OPERATION TIME

### Classical Meta-Analysis

**Fixed and Random Effects**

|                                    | Q        | df | p      |
|------------------------------------|----------|----|--------|
| Omnibus test of Model Coefficients | 3.770    | 1  | 0.052  |
| Test of Residual Heterogeneity     | 2164.395 | 18 | < .001 |

*Note.* *p* -values are approximate.

*Note.* The model was estimated using Restricted ML method.

**Coefficients**

|           | Estimate | Standard Error | z      | p     | 95% Confidence Interval |       |
|-----------|----------|----------------|--------|-------|-------------------------|-------|
|           |          |                |        |       | Lower                   | Upper |
| intercept | -1.353   | 0.697          | -1.942 | 0.052 | -2.719                  | 0.013 |

*Note.* Wald test.

**Residual Heterogeneity Estimates**

|                    | Estimate | 95% Confidence Interval |          |
|--------------------|----------|-------------------------|----------|
|                    |          | Lower                   | Upper    |
| $\tau^2$           | 9.127    | 5.190                   | 20.562   |
| $\tau$             | 3.021    | 2.278                   | 4.535    |
| I <sup>2</sup> (%) | 99.886   | 99.799                  | 99.949   |
| H <sup>2</sup>     | 875.627  | 498.376                 | 1971.493 |

Rank correlation test for Funnel plot asymmetry

|           | Kendall's $\tau$ | p     |
|-----------|------------------|-------|
| Rank test | -0.310           | 0.068 |

Regression test for Funnel plot asymmetry ("Egger's test")

|     | z      | p     |
|-----|--------|-------|
| sei | -1.423 | 0.155 |

Plot

Funnel Plot

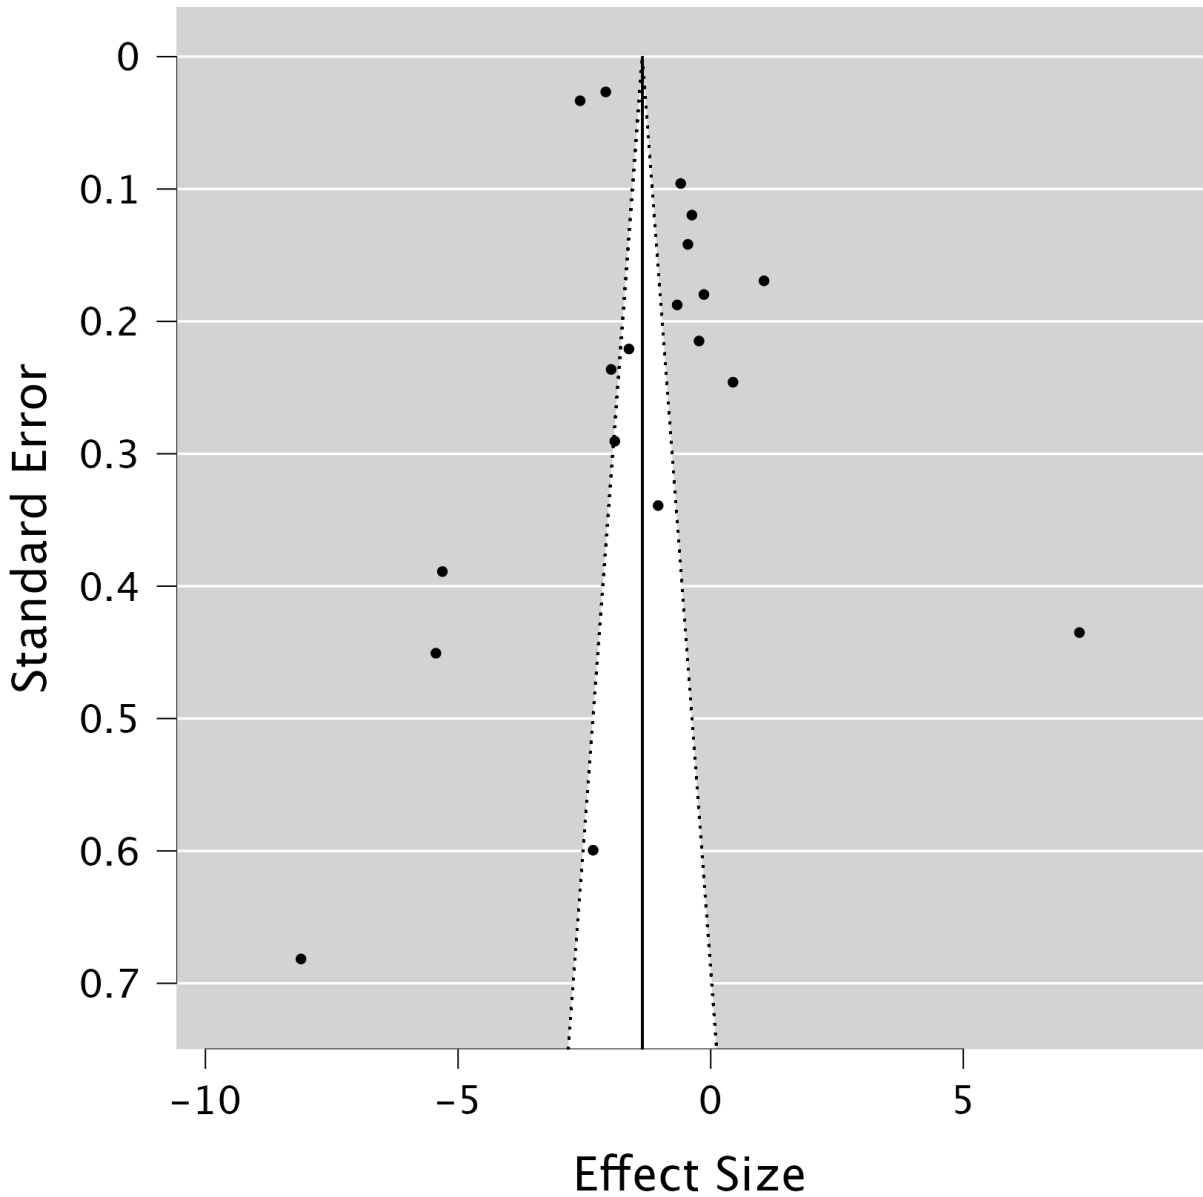

PET-PEESE

## Model Tests

### Test of Effect

| t          | df | p      |
|------------|----|--------|
| PET -9.492 | 17 | < .001 |

### Test of Publication Bias

| t         | df | p     |
|-----------|----|-------|
| PET 2.160 | 17 | 0.045 |

## Estimates

### Mean Estimates ( $\mu$ )

|       | Estimate | Standard Error | t      | df | p      | 95% Confidence Interval |        |
|-------|----------|----------------|--------|----|--------|-------------------------|--------|
|       |          |                |        |    |        | Lower                   | Upper  |
| PET   | -2.333   | 0.246          | -9.492 | 17 | < .001 | -2.815                  | -1.851 |
| PEESE | -2.044   | 0.219          | -9.341 | 17 | < .001 | -2.473                  | -1.615 |

## Robust Bayesian Meta-Analysis

### Summary

#### Model Summary

|                  | Models | P(M)  | P(M data) | Inclusion BF |
|------------------|--------|-------|-----------|--------------|
| Effect           | 18/36  | 0.500 | 0.483     | 0.935        |
| Heterogeneity    | 18/36  | 0.500 | 1.000     | $\infty$     |
| Publication bias | 32/36  | 0.500 | 0.826     | 4.731        |

#### Model Averaged Estimates

|                          | Mean   | Median | 95% CI |       |
|--------------------------|--------|--------|--------|-------|
|                          |        |        | Lower  | Upper |
| Effect size ( $\mu$ )    | -0.191 | 0.000  | -1.580 | 0.916 |
| Heterogeneity ( $\tau$ ) | 3.046  | 2.976  | 2.163  | 4.357 |

*Note.* The estimates are summarized on the none scale (priors were specified on the none scale).

#### Model Averaged Weights ( $\omega$ )

| <i>p</i> -values interval |       | Mean  | Median | 95% CI |       |
|---------------------------|-------|-------|--------|--------|-------|
| Lower                     | Upper |       |        | Lower  | Upper |
| 0.000                     | 0.025 | 1.000 | 1.000  | 1.000  | 1.000 |
| 0.025                     | 0.050 | 0.997 | 1.000  | 1.000  | 1.000 |
| 0.050                     | 0.100 | 0.856 | 1.000  | 0.304  | 1.000 |



**Model Averaged Weights ( $\omega$ )**

| <i>p</i> -values interval |       |       |        |        |       |
|---------------------------|-------|-------|--------|--------|-------|
| Lower                     | Upper | Mean  | Median | 95% CI |       |
|                           |       |       |        | Lower  | Upper |
| 0.100                     | 0.950 | 0.727 | 1.000  | 0.136  | 1.000 |
| 0.950                     | 0.975 | 0.729 | 1.000  | 0.136  | 1.000 |
| 0.975                     | 1.000 | 0.731 | 1.000  | 0.136  | 1.000 |

*Note.* (Estimated publication weights omega correspond to one-sided p-values.)

**Model Averaged PET-PEESE Estimates**

|       |       | 95% CI |       |        |  |
|-------|-------|--------|-------|--------|--|
|       | Mean  | Median | Lower | Upper  |  |
| PET   | 0.347 | 0.000  | 0.000 | 4.556  |  |
| PEESE | 2.410 | 0.000  | 0.000 | 14.579 |  |
